# Supplementary material for: A sensitive and selective liquid chromatography mass spectrometry method for simultaneous estimation of anti-diabetic drugs inhibiting DPP-4 enzyme in human plasma: overcoming challenges associated with low recovery and sensitivity
Source: Royal Society of Chemistry journal article supplement (doi:10.1039/c5ay00342c), 2015-01-01
Supplement: c5ay00342c1.pdf [file c5ay00342c1.pdf]

## Supporting Information

**A sensitive and selective liquid chromatography mass spectrometry method for simultaneous estimation of anti-diabetic drugs inhibiting DPP-4 enzyme in human plasma. Overcoming challenges associated with low recovery and sensitivity.**

Shantikumar S, Prashanth B, Lingesh A, David Paul, Srinivas R, Satheesh Kumar N.

**\*Corresponding Author** : Dr. N. Satheesh Kumar, M. Pharm., Ph.D., Assistant Professor  
Department of Pharmaceutical Analysis National Institute of Pharmaceutical Education and  
Research [NIPER], Balanagar, Hyderabad-500037, India, E.mail: [satish@niperhyd.ac.in](mailto:satish@niperhyd.ac.in),  
Phone: +919652766320

Table S1. Study of recovery using diluents like 0.1% acetic acid, 0.1% formic acid, 0.1 % trifluoro acetic acid and acetonitrile for vildagliptin (VIL).

| Diluent                     | Concentration of VIL (ng/mL) |         |          |         |         |          |
|-----------------------------|------------------------------|---------|----------|---------|---------|----------|
|                             | Polypropylene                |         |          | Glass   |         |          |
|                             | 3                            | 30      | 300      | 3       | 30      | 300      |
| 0.1 % acetic acid           | 2.3812                       | 27.8445 | 273.1823 | 2.4599  | 24.7231 | 257.9664 |
|                             | 2.5134                       | 25.9345 | 269.6732 | 2.3445  | 22.8824 | 260.9416 |
|                             | 2.2214                       | 26.0132 | 276.9743 | 2.2959  | 23.4457 | 270.4295 |
| Mean                        | 2.3766                       | 26.5933 | 273.2733 | 2.3667  | 23.6837 | 263.1125 |
| STD                         | 0.1350                       | 1.0803  | 3.6508   | 0.0842  | 0.9431  | 6.5089   |
| % Recovery                  | 79.2222                      | 88.6444 | 91.0911  | 78.8922 | 78.9457 | 87.7041  |
| 0.1 % trifluoro acetic acid | 2.8001                       | 26.42   | 254.7    | 2.8859  | 26.3829 | 244.4128 |
|                             | 1.9323                       | 26.88   | 253.93   | 2.697   | 26.0909 | 250.3432 |
|                             | 2.8867                       | 25.59   | 257.93   | 2.6812  | 27.667  | 243.2161 |
| Mean                        | 2.5366                       | 26.2966 | 255.52   | 2.7547  | 26.7136 | 245.9907 |
| STD                         | 0.5269                       | 0.6537  | 2.1223   | 0.1139  | 0.8385  | 3.8166   |
| % Recovery                  | 84.5555                      | 87.6555 | 85.17333 | 91.8233 | 89.0453 | 81.9969  |
| 0.1% formic acid            | 3.3456                       | 31.0539 | 274.5951 | 2.1151  | 27.0539 | 253.2488 |
|                             | 3.0327                       | 29.0228 | 263.763  | 2.5669  | 27.0228 | 256.9274 |
|                             | 2.8489                       | 28.2788 | 275.4254 | 2.0954  | 28.2788 | 255.3543 |
| Mean                        | 3.0790                       | 29.4518 | 271.2612 | 2.2591  | 27.4518 | 255.1768 |
| STD                         | 0.2524                       | 1.4364  | 6.5068   | 0.2667  | 0.7163  | 1.8457   |
| % Recovery                  | 102.3333                     | 98.1727 | 90.4203  | 75.3044 | 91.5061 | 85.0589  |
| Acetonitrile                | 2.8481                       | 28.1641 | 289.7419 | 3.0964  | 26.3833 | 294.8317 |
|                             | 2.8742                       | 25.952  | 292.644  | 2.54    | 26.0466 | 289.5476 |
|                             | 2.2224                       | 27.3146 | 286.1049 | 2.4117  | 26.4224 | 286.1857 |
| Mean                        | 2.6482                       | 27.1435 | 289.4969 | 2.6827  | 26.2841 | 290.1883 |
| STD                         | 0.3690                       | 1.1159  | 3.2764   | 0.3639  | 0.2066  | 4.3584   |
| % Recovery                  | 88.2744                      | 90.4785 | 96.4989  | 89.4233 | 87.6136 | 96.7294  |

Table S2. Study of recovery using diluents like 0.1% acetic acid, 0.1% formic acid, 0.1 % trifluoro acetic acid and acetonitrile for saxagliptin (SAX).

| Diluent                     | Concentration of SAX (ng/mL) |          |          |          |         |          |
|-----------------------------|------------------------------|----------|----------|----------|---------|----------|
|                             | Polypropylene                |          |          | Glass    |         |          |
|                             | 3                            | 30       | 300      | 3        | 30      | 300      |
| 0.1 % acetic acid           | 2.5824                       | 29.9767  | 294.8968 | 3.0582   | 27.9899 | 256.689  |
|                             | 3.4408                       | 28.5057  | 277.2088 | 2.6442   | 28.5911 | 268.6166 |
|                             | 3.1369                       | 28.827   | 282.7204 | 2.8648   | 26.6359 | 269.1789 |
| Mean                        | 3.0534                       | 29.1031  | 284.942  | 2.8557   | 27.7389 | 264.8282 |
| STD                         | 0.4353                       | 0.7734   | 9.0509   | 0.2071   | 1.0015  | 7.0543   |
| % Recovery                  | 101.7789                     | 97.0104  | 94.9806  | 95.1911  | 92.4632 | 88.2761  |
| 0.1 % trifluoro acetic acid | 3.3881                       | 29.8432  | 279.6561 | 2.9482   | 24.242  | 271.3002 |
|                             | 3.301                        | 28.8141  | 281.6229 | 3.5809   | 30.2454 | 264.7626 |
|                             | 3.3663                       | 30.0003  | 280.0287 | 3.2546   | 29.1676 | 270.2334 |
| Mean                        | 3.3518                       | 29.5525  | 280.4359 | 3.2612   | 27.885  | 268.7654 |
| STD                         | 0.0453                       | 0.6443   | 1.0447   | 0.3164   | 3.2006  | 3.5073   |
| % Recovery                  | 111.7267                     | 98.5084  | 93.47863 | 108.7078 | 92.95   | 89.5885  |
| 0.1% formic acid            | 3.7539                       | 30.2995  | 288.4595 | 1.5315   | 30.2995 | 250.2344 |
|                             | 3.4047                       | 32.2285  | 280.1223 | 1.9594   | 25.2285 | 252.721  |
|                             | 3.3706                       | 31.925   | 278.8338 | 1.4344   | 24.925  | 256.9189 |
| Mean                        | 3.5097                       | 31.4843  | 282.4719 | 1.6418   | 26.8177 | 253.2914 |
| STD                         | 0.2121                       | 1.0373   | 5.2253   | 0.2793   | 3.0192  | 3.3786   |
| % Recovery                  | 116.9911                     | 104.9478 | 94.1573  | 54.7256  | 89.3922 | 84.4305  |
| Acetonitrile                | 3.1654                       | 29.7398  | 313.7027 | 2.9364   | 29.643  | 319.9265 |
|                             | 3.2703                       | 29.8306  | 307.7595 | 2.9942   | 29.2272 | 305.2905 |
|                             | 2.8606                       | 29.7251  | 307.2654 | 3.175    | 29.7916 | 320.8583 |
| Mean                        | 3.0988                       | 29.7652  | 309.5759 | 3.0352   | 29.5539 | 315.3584 |
| STD                         | 0.2128                       | 0.0571   | 3.5825   | 0.1245   | 0.2926  | 8.7315   |
| % Recovery                  | 103.2922                     | 99.2172  | 103.192  | 101.1733 | 98.5131 | 105.1195 |

Table S3. Study of recovery using diluents like 0.1% acetic acid, 0.1% formic acid, 0.1 % trifluoro acetic acid and acetonitrile for sitagliptin (SIT).

| Diluent                     | Concentration (ng/mL) |          |          |          |         |          |
|-----------------------------|-----------------------|----------|----------|----------|---------|----------|
|                             | Polypropylene         |          |          | Glass    |         |          |
|                             | 3                     | 30       | 300      | 3        | 30      | 300      |
| 0.1 % acetic acid           | 2.159                 | 26.5411  | 315.6356 | 2.6014   | 22.5908 | 271.9005 |
|                             | 2.7265                | 26.0369  | 313.2978 | 2.4298   | 21.9393 | 282.8101 |
|                             | 2.5557                | 25.9892  | 308.4133 | 2.4364   | 22.6802 | 278.0529 |
| Mean                        | 2.4804                | 26.1890  | 312.4489 | 2.4892   | 22.4034 | 277.5878 |
| STD                         | 0.2911                | 0.3058   | 3.6852   | 0.0972   | 0.4044  | 5.4696   |
| % Recovery                  | 82.68                 | 87.2969  | 104.1496 | 82.9733  | 74.6781 | 92.5293  |
| 0.1 % trifluoro acetic acid | 3.0901                | 28.3975  | 319.9387 | 3.0066   | 27.0002 | 288.8749 |
|                             | 3.419                 | 28.3511  | 316.09   | 3.4081   | 26.4885 | 295.6252 |
|                             | 3.1552                | 28.3592  | 319.4784 | 3.0403   | 26.0575 | 292.0427 |
| Mean                        | 3.2214                | 28.3693  | 318.5024 | 3.1516   | 26.5154 | 292.1809 |
| STD                         | 0.1742                | 0.0247   | 2.1018   | 0.2227   | 0.4719  | 3.3773   |
| % Recovery                  | 107.3811              | 94.5642  | 106.1675 | 105.0556 | 88.3847 | 97.3936  |
| 0.1% formic acid            | 4.0292                | 37.3679  | 338.9608 | 2.3426   | 27.3679 | 292.9326 |
|                             | 3.11                  | 30.7103  | 331.5842 | 2.6896   | 27.7103 | 288.9213 |
|                             | 3.7343                | 29.9262  | 333.5891 | 1.9711   | 27.9262 | 292.7856 |
| Mean                        | 3.6245                | 32.6681  | 334.7114 | 2.3344   | 27.6681 | 291.5465 |
| STD                         | 0.4693                | 4.0889   | 3.8142   | 0.3593   | 0.2815  | 2.2746   |
| % Recovery                  | 120.8167              | 108.8938 | 111.5705 | 77.8144  | 92.2271 | 97.1821  |
| Acetonitrile                | 3.0225                | 30.2184  | 323.6499 | 2.5457   | 23.3935 | 311.8969 |
|                             | 3.1594                | 29.1035  | 315.9862 | 2.9215   | 23.8521 | 306.6095 |
|                             | 2.7683                | 28.008   | 309.5032 | 2.5213   | 23.3789 | 307.3906 |
| Mean                        | 2.9834                | 29.1099  | 316.3798 | 2.6628   | 23.5415 | 308.6323 |
| STD                         | 0.1985                | 1.1052   | 7.0815   | 0.2243   | 0.2691  | 2.8540   |
| % Recovery                  | 99.4467               | 97.0332  | 105.4599 | 88.7611  | 78.4717 | 102.8774 |

Table S4. Study of recovery using diluents like 0.1% acetic acid, 0.1% formic acid, 0.1 % trifluoro acetic acid and acetonitrile for linagliptin (LIN).

| Diluent                     | Concentration (ng/mL) |                 |                |                |                |                |
|-----------------------------|-----------------------|-----------------|----------------|----------------|----------------|----------------|
|                             | Polypropylene         |                 |                | Glass          |                |                |
|                             | 3                     | 30              | 300            | 3              | 30             | 300            |
| 0.1 % acetic acid           | 3.0491                | 33.0267         | 263.3356       | 1.3028         | 18.7827        | 190.0781       |
|                             | 1.8034                | 30.1906         | 261.604        | 1.3912         | 17.4579        | 195.784        |
|                             | 2.4002                | 28.6165         | 254.765        | 1.0837         | 16.907         | 191.9911       |
| Mean                        | 2.4176                | 30.6113         | 259.9015       | 1.2592         | 17.7159        | 192.6177       |
| STD                         | 0.6230                | 2.2349          | 4.5318         | 0.1583         | 0.9641         | 2.9041         |
| <b>% Recovery</b>           | <b>80.5856</b>        | <b>102.0376</b> | <b>86.6338</b> | <b>41.9744</b> | <b>59.0529</b> | <b>64.2059</b> |
| 0.1 % trifluoro acetic acid | 3.0216                | 30.9076         | 265.8895       | 3.0197         | 29.5096        | 247.0762       |
|                             | 2.7796                | 30.2271         | 268.8633       | 2.5733         | 29.0551        | 255.3517       |
|                             | 3.3127                | 30.5561         | 272.6607       | 2.6818         | 28.593         | 243.6446       |
| Mean                        | 3.0379                | 30.5636         | 269.1378       | 2.7582         | 29.0526        | 248.6908       |
| STD                         | 0.2669                | 0.3403          | 3.3939         | 0.2328         | 0.4583         | 6.0182         |
| <b>% Recovery</b>           | <b>101.2656</b>       | <b>101.8787</b> | <b>89.7126</b> | <b>91.9422</b> | <b>96.8419</b> | <b>82.8969</b> |
| 0.1% formic acid            | 3.3545                | 29.8018         | 295.838        | 0.4461         | 21.8018        | 217.6048       |
|                             | 2.7999                | 27.4061         | 274.0868       | 0.9307         | 22.4061        | 209.7765       |
|                             | 3.1314                | 28.0611         | 267.1174       | 1.1891         | 24.0611        | 214.3366       |
| Mean                        | 3.0953                | 28.423          | 279.0141       | 0.8553         | 22.7563        | 213.906        |
| STD                         | 0.2791                | 1.2382          | 14.9809        | 0.3771         | 1.1696         | 3.9319         |
| <b>% Recovery</b>           | <b>103.1756</b>       | <b>94.7433</b>  | <b>93.0046</b> | <b>28.51</b>   | <b>75.8544</b> | <b>71.3019</b> |
| Acetonitrile                | 2.7077                | 31.0679         | 281.7317       | 1.3357         | 15.1977        | 208.8789       |
|                             | 2.4725                | 30.3544         | 255.1538       | 1.3689         | 15.3843        | 202.2313       |
|                             | 1.8912                | 31.0991         | 255.4979       | 1.0337         | 14.3935        | 206.1667       |
| Mean                        | 2.3571                | 30.8405         | 264.1278       | 1.2461         | 14.9918        | 205.759        |
| STD                         | 0.4203                | 0.4212          | 15.2464        | 0.1847         | 0.5265         | 3.3425         |

|            |         |          |         |         |         |         |
|------------|---------|----------|---------|---------|---------|---------|
| % Recovery | 78.5711 | 102.8016 | 88.0426 | 41.5367 | 49.9728 | 68.5863 |
|------------|---------|----------|---------|---------|---------|---------|

Table S5. Study of recovery using diluents like 0.1% acetic acid, 0.1% formic acid, 0.1 % trifluoro acetic acid and acetonitrile for teneligliptin (TEN).

| Diluent                     | Concentration (ng/mL) |         |          |         |         |          |
|-----------------------------|-----------------------|---------|----------|---------|---------|----------|
|                             | Polypropylene         |         |          | Glass   |         |          |
|                             | 3                     | 30      | 300      | 3       | 30      | 300      |
| 0.1 % acetic acid           | 2.7178                | 30.1208 | 276.9821 | 0       | 19.8503 | 237.7693 |
|                             | 1.7408                | 29.8476 | 282.0224 | 1.5712  | 20.5622 | 237.1028 |
|                             | 1.0692                | 27.9245 | 277.5815 | 2.7847  | 20.4921 | 240.2083 |
| Mean                        | 1.8426                | 29.2976 | 278.862  | 1.4519  | 20.3015 | 238.3601 |
| STD                         | 0.8290                | 1.1969  | 2.7533   | 1.3962  | 0.3924  | 1.6349   |
| % Recovery                  | 61.42                 | 97.6588 | 92.954   | 48.3989 | 67.6718 | 79.4534  |
| 0.1 % trifluoro acetic acid | 3.9684                | 27.2271 | 294.5008 | 2.8124  | 29.4448 | 272.0046 |
|                             | 3.9366                | 30.1836 | 294.534  | 1.9162  | 27.2953 | 278.1967 |
|                             | 2.9867                | 29.4444 | 294.6597 | 2.0406  | 28.4943 | 274.3448 |
| Mean                        | 3.6306                | 28.9517 | 294.5648 | 2.2564  | 28.4115 | 274.8487 |
| STD                         | 0.5578                | 1.5385  | 0.0838   | 0.4855  | 1.0771  | 3.1266   |
| % Recovery                  | 121.0189              | 96.5056 | 98.1883  | 75.2133 | 94.7049 | 91.6162  |
| 0.1% formic acid            | 3.0456                | 26.5678 | 295.401  | 0       | 17.4055 | 232.9455 |
|                             | 3.3059                | 28.7895 | 296.4169 | 0       | 18.9958 | 231.669  |
|                             | 0.371                 | 26.5467 | 288.9763 | 0       | 0       | 236.2025 |
| Mean                        | 2.2408                | 27.3013 | 293.5981 | 0       | 12.1338 | 233.6057 |
| STD                         | 1.6245                | 1.2888  | 4.0347   | 0       | 10.5382 | 2.3377   |
| % Recovery                  | 74.6944               | 91.0044 | 97.8660  | 0       | 40.4458 | 77.8685  |
| Acetonitrile                | 4.1125                | 32.3922 | 285.9734 | 1.8508  | 0       | 250.8775 |
|                             | 1.9001                | 29.6111 | 275.2096 | 0       | 16.9824 | 242.217  |
|                             | 0.8621                | 30.1461 | 275.8807 | 0.5562  | 0       | 233.6039 |
| Mean                        | 2.2916                | 30.7165 | 279.0212 | 0.8023  | 5.6608  | 242.2328 |

|            |         |          |         |         |         |         |
|------------|---------|----------|---------|---------|---------|---------|
| STD        | 1.6602  | 1.4757   | 6.0301  | 0.9496  | 9.8047  | 8.6368  |
| % Recovery | 76.3856 | 102.3882 | 93.0071 | 26.7444 | 18.8693 | 80.7443 |
